# Supplementary material for: TGF-β Superfamily Gene Expression and Induction of the Runx1 Transcription Factor in Adult Neurogenic Regions after Brain Injury
Source: PLoS One. 2013 Mar 21;8(3):e59250. doi: 10.1371/journal.pone.0059250 (PMC3605457; doi:10.1371/journal.pone.0059250)
Supplement: Table S1 — Expression of TGF-β superfamily genes after CCI. The mRNA expression levels of all genes measured by qPCR array analysis are shown at 1, 3, and 7 dpi in the DG (A) and SVZ (B). mRNA levels are expressed as relative fold change from their expression in the respective control tissues. *p<0.05, **p<0.01, ***p<0.001. (XLSX) [file pone.0059250.s003.xlsx]

## Sheet: Sheet2
Dentate Gyrus	Average Fold change				Subventricular Zone	Average fold change
Gene Symbol	1 dpi	3 dpi	7 dpi		Gene Symbol	1 dpi	3 dpi	7 dpi
Acvr1	0.87	1.09	0.58*		Acvr1	0.98	0.68*	0.82
Acvr2a	0.44**	0.76	0.32***		Acvr2a	0.71**	0.65***	0.80***
Acvrl1	1.68	1.15	1.35		Acvrl1	1.04	0.59**	0.64*
Amh	1.45	1.86	0.61		Amh	1.01	1.13	1.38
Amhr2	1.69	1.21	1.6		Amhr2	2.21**	1.3	1.45
Bambi	0.4	1.09	0.28*		Bambi	1.15	1.6	1.1
Bglap2	0.34	0.96	6.11*		Bglap2	0.63	0.71	2.04
Bmp1	0.85	0.83	0.47*		Bmp1	1.1	0.76*	1.02
Bmp2	2.20**	0.95	1.90*		Bmp2	0.83	0.65*	1.37*
Bmp3	0.53*	0.82	0.39*		Bmp3	1.79	0.09*	0.68
Bmp4	0.46*	1.7*	2.74***		Bmp4	0.64	1.88	1.66
Bmp5	1.11	0.82	1.63		Bmp5	1.59	6.69**	3.21
Bmp6	0.74	0.92	2.65		Bmp6	0.5	2.41**	1.96*
Bmp7	1.22	0.85	1.85		Bmp7	1.14	4.71	2.38***
Bmper	0.51	1.11	1.09		Bmper	0.62*	1.04	1.23
Bmpr1a	0.69*	1.22	0.96		Bmpr1a	0.89	1.02	1.03
Bmpr1b	0.48**	1.22	1.36*		Bmpr1b	0.64*	0.75	1.4*
Bmpr2	0.68*	0.94	0.6***		Bmpr2	1.11	0.94	1
Cd79a	0.81	0.48	0.94		Cd79a	0.95	0.33**	1.12
Cdc25a	0.89	0.95	0.91		Cdc25a	0.89	1.14	1.17
Cdkn1a	5.52	1.57	3.86**		Cdkn1a	2.83***	1.66*	1.46
Cdkn2b	1.92	1.28	2.72***		Cdkn2b	1.1	1.36	1.2
Chrd	0.38***	0.62**	0.23***		Chrd	0.77	0.44**	0.86
Col1a1	0.93	0.68	5.54		Col1a1	1.68	1.33	1.94
Col1a2	1.66	0.86	11.72**		Col1a2	0.71	2.83***	1.73*
Col3a1	3.14	1.5	12.64***		Col3a1	2.38*	2.43*	2.42*
Dlx2	0.46	0.94	0.38*		Dlx2	0.47*	0.99	1.35
Eng	1.51	1.34	1.49*		Eng	1	1.21	1.2
Mecom	1.02	0.63	0.69**		Mecom	1.55	1.01	1.52
Fkbp1b	0.71	0.89	0.61**		Fkbp1b	0.76*	0.54*	0.81
Fos	3.68**	2.13*	2.63**		Fos	3.07	2.26	0.52
Fst	0.26***	0.62	0.08***		Fst	0.79	0.56*	0.25**
Gdf1	0.57**	0.9	0.49***		Gdf1	1.02	0.62*	0.96
Gdf2	3.08	1	1.41		Gdf2	1.42	0.61	1.15
Gdf3	2.58	0.32	2.36		Gdf3	2.32	0.8	2.23
Gdf5	0.4	1.04	1.51		Gdf5	0.49	2.65	3.11*
Gdf6	0.38	0.65	0.31*		Gdf6	1.56	1.08	1.29
Gdf7	0.85	0.61	0.28**		Gdf7	1.35	1.12	1.37
Gsc	2.5	0.57	2		Gsc	2.06	3.22*	1.51
Id1	1.75	1.11	1.2		Id1	1.14	2.07**	1.39
Id2	1.22	1.06	1.03		Id2	0.99	1	1.22
Igf1	0.45	0.91	5.73**		Igf1	0.96	0.78	1.1
Igfbp3	4.1	1.05	1.04		Igfbp3	2.04	2.22*	1.05
Il6	4.44	0.52	0.73		Il6	4.99**	1.05	2.19
Inha	0.33**	0.69	0.26**		Inha	0.83	0.55***	0.81
Inhba	1.62	0.72	0.46		Inhba	2.3	1.09	0.98
Inhbb	1.25	1.06	0.92		Inhbb	0.92	1.14	1.38
Itgb5	0.92	2.43	4.7***		Itgb5	0.82	2.02**	2.09**
Itgb7	2.39*	1.05	1.89*		Itgb7	0.79	0.6***	0.81
Jun	1.26	1.4	0.61		Jun	2.65***	1.1	1.35
Junb	1.88	1.02	1.11		Junb	1.61	0.9	0.76
Lefty1	1.56	1	1.58		Lefty1	1.61*	1.08	1.15
Ltbp1	2.05*	1.27	1.32		Ltbp1	1.65*	0.81	1.26
Ltbp2	2.27	0.57	0.57		Ltbp2	1.76	0.77	0.84
Ltbp4	0.47	0.95	0.63*		Ltbp4	0.66**	1.08	1.14
Myc	2.54*	1.18	1.4		Myc	2.49***	1	0.94
Nbl1	0.87	0.97	1.06		Nbl1	1.02	1.81	1.51
Nodal	1.12	0.45	0.91		Nodal	1.79	0.44	1.53
Nog	0.79	0.56	0.79		Nog	1.35	1.05	1.73
Nr0b1	0.81	0.64	0.39		Nr0b1	1.38	0.53	1.45
Pdgfb	0.94	0.97	0.87		Pdgfb	1.46**	1.4**	1.37*
Plat	1.5	1.31	1.62		Plat	1.01	0.75	1.21
Plau	4.54	1.3	15.93***		Plau	2.32	0.92	2.17
Runx1	6.59**	2.48	8.19***		Runx1	2.86***	1.39	2.18**
Serpine1	67.61***	1.76	2.56		Serpine1	10.86***	1.86	1.3
Smad1	1.03	1.06	0.86		Smad1	0.88	0.92	0.94
Smad2	0.83	1.04	0.8*		Smad2	0.75*	0.97	0.91
Smad3	0.67	1.03	0.35**		Smad3	1.01	0.89	0.98
Smad4	0.72	0.91	0.51***		Smad4	0.95	0.74**	0.89
Smad5	0.92	1.14	0.93		Smad5	0.71*	1.01	0.96
Smurf1	0.94	0.79	0.9		Smurf1	0.96	0.64**	0.95
Sox4	1	1.05	1.02		Sox4	0.62	0.69	1.51
Stat1	1.96	1.51	6.34***		Stat1	1.14	1.07	2.31***
Tdgf1	0.55	1.57	3.22***		Tdgf1	1.31	1.76	1.96
Tgfb1	3.02**	2.52*	8.56***		Tgfb1	1.67**	1.55**	2.02***
Tgfb1i1	1.3	0.77	1		Tgfb1i1	1.58*	0.91	1.19
Tsc22d1	0.66*	1.04	0.6**		Tsc22d1	0.81	0.98	1
Tgfb2	0.85	0.85	0.47***		Tgfb2	0.83	2.76***	2.11
Tgfb3	0.92	1.4	1.26		Tgfb3	1.26	0.96	1.24
Tgfbi	35.56***	2.33	4.56		Tgfbi	3.35***	2.31**	1.98*
Tgfbr1	0.63	1.18	2.08***		Tgfbr1	0.85	0.81	1.52**
Tgfbr2	1.63	1.78***	4.48***		Tgfbr2	1.19	1.49	2.25**
Tgfbr3	0.58**	0.76	0.47		Tgfbr3	1.02	1.73	1.96*
Tgfbrap1	0.76	1.19	0.77		Tgfbrap1	0.98	0.99	0.9
